# Supplementary material for: Regioselective RAFT–HDA: a new approach to synthesize hyperbranched polymers with precise topology control
Source: Royal Society of Chemistry journal article supplement (doi:10.1039/d4py01376j), 2025-01-01
Supplement: d4py01376j1.pdf [file d4py01376j1.pdf]

## Supporting Information

### **Regioselective RAFT-HDA: a New Approach to Hyperbranched Polymers with Precise Topology Control**

Jiayi Zhang<sup>a,b</sup>, Ruyue Cao<sup>a,b</sup>, Xiaowei Wang<sup>a,b</sup>, Yixuan Wang<sup>a,b</sup> and Anchao Feng<sup>\*a,b</sup>

*a. State Key Laboratory of Organic-Inorganic Composites, Beijing University of Chemical Technology, Beijing 100029, People's Republic of China.*

*b. Center of Advanced Elastomer Materials, College of Materials Science and Engineering, Beijing University of Chemical Technology, Beijing 100029, China.*

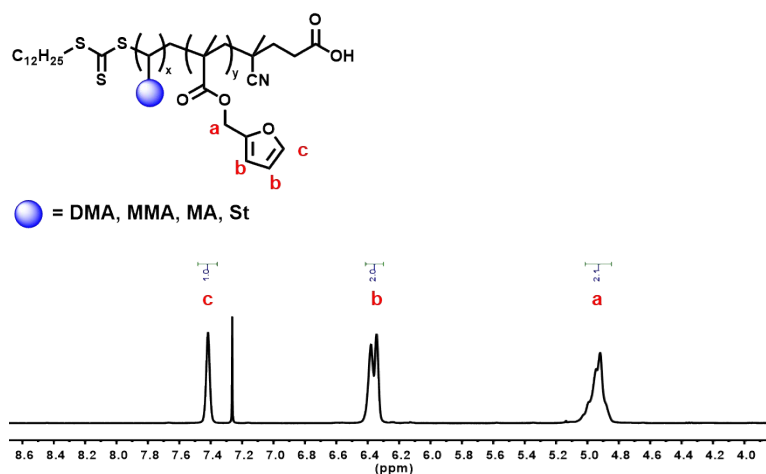

**Fig. S1**  $^1H$  NMR spectrum (DMSO) of the diene building block diene moiety.

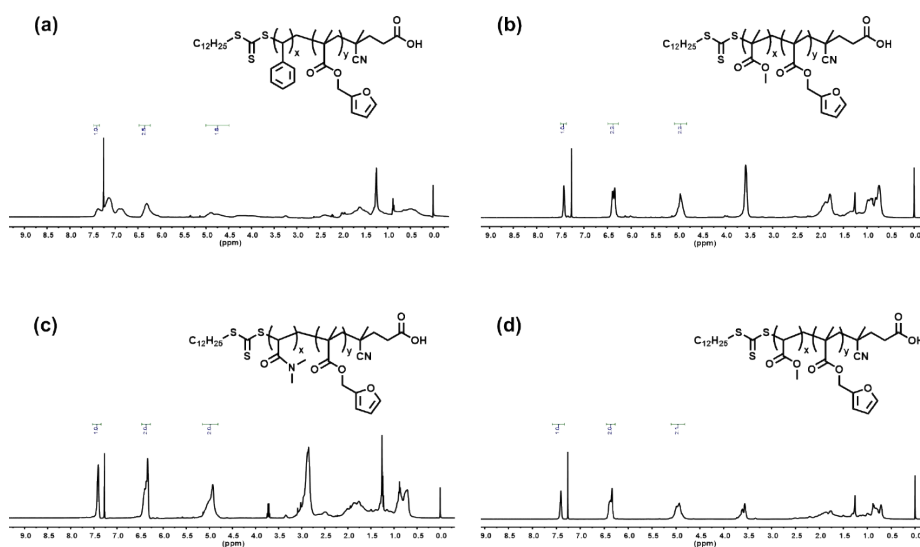

**Fig.S2** The  $^1H$  NMR spectrum (DMSO) of the diene building block: a)SF; b)MMF; c)DF; d)MF.

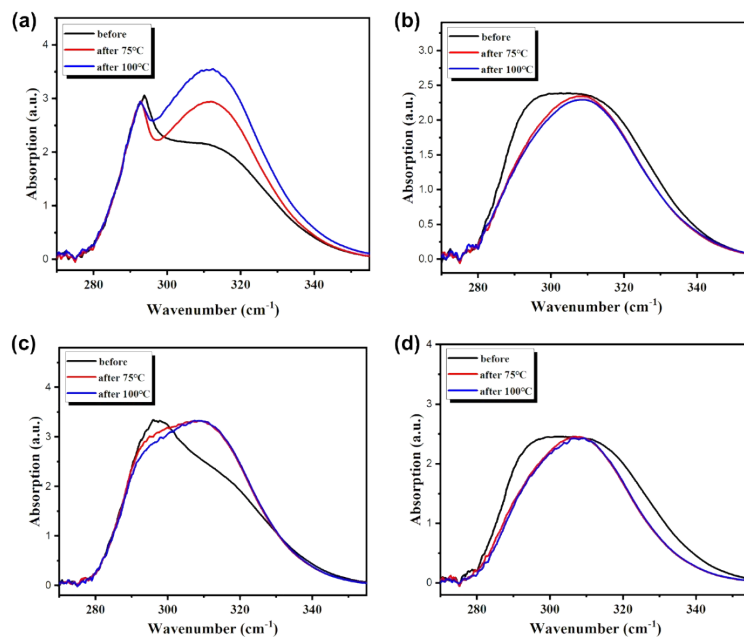

**Fig. S3** Changes in the UV absorption spectra before the reaction (black), after the reaction at 75°C (red), and after the reaction at 100°C (blue): a) St-based polymer; b) MMA-based polymer; c) DMA-based polymer; d) MA-based polymer.

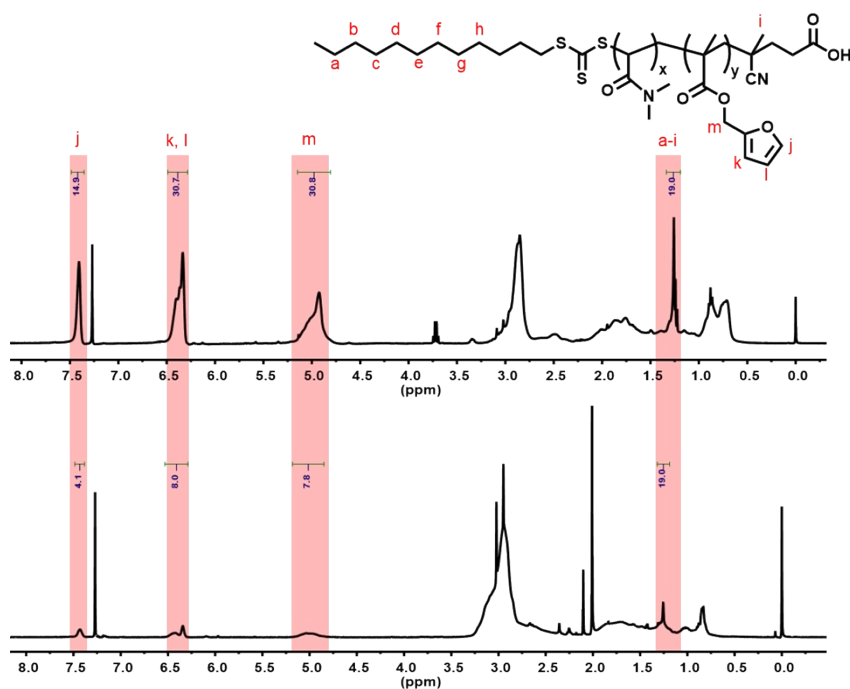

**Fig. S4** The <sup>1</sup>H NMR spectrum (DMSO) of DF (top) and D-DF (bottom).

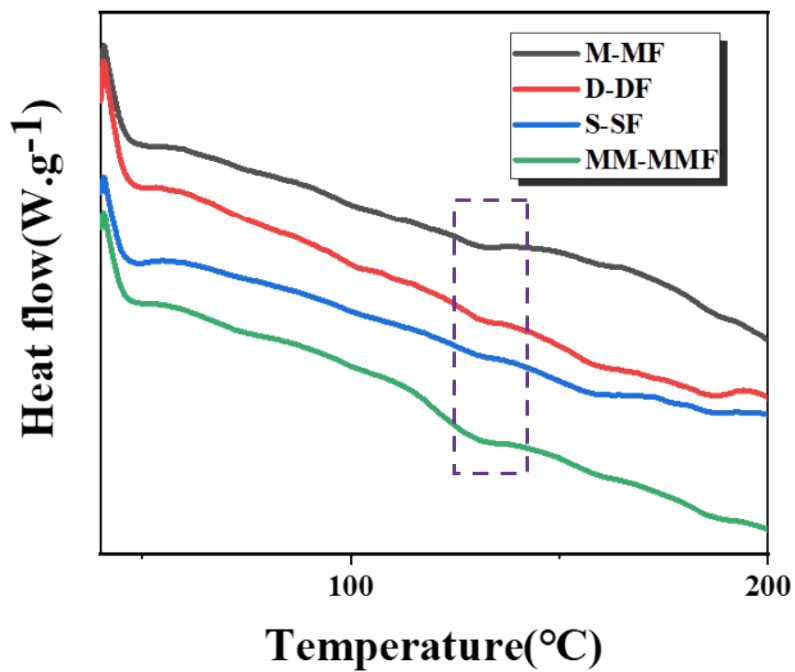

**Fig. S5** DSC characterization results of four different monomer-based building blocks of D-DF, S-SF, M-MF and MM-MMF after HDA reaction.

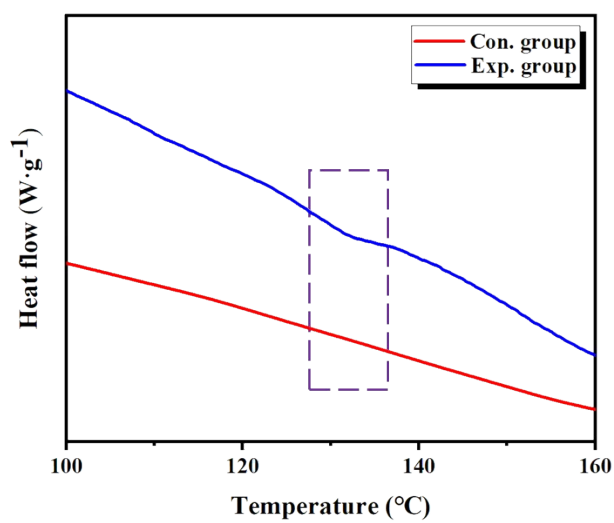

**Fig. S6** The DSC results of the brush-type polymer (blue) and the control group (polymer without the HDA reaction) (red).

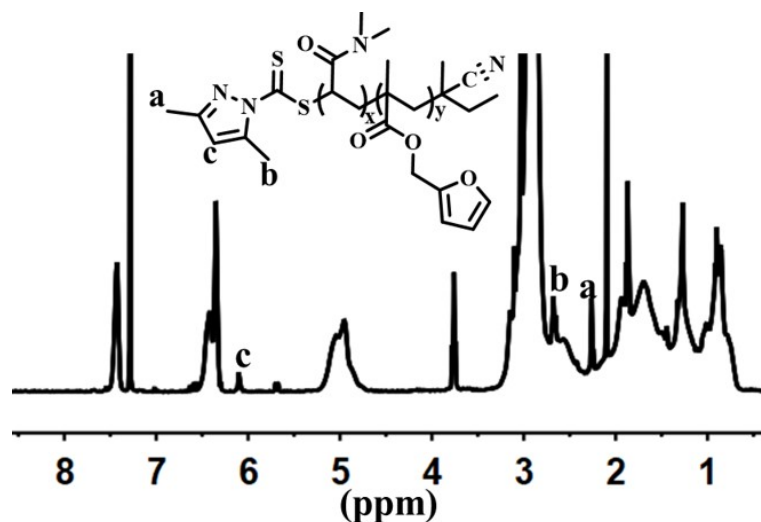

Fig. S7  $^1\text{H}$  NMR spectrum ( $\text{CDCl}_3$ ) of the macromonomer  $\text{AB}_x$ .

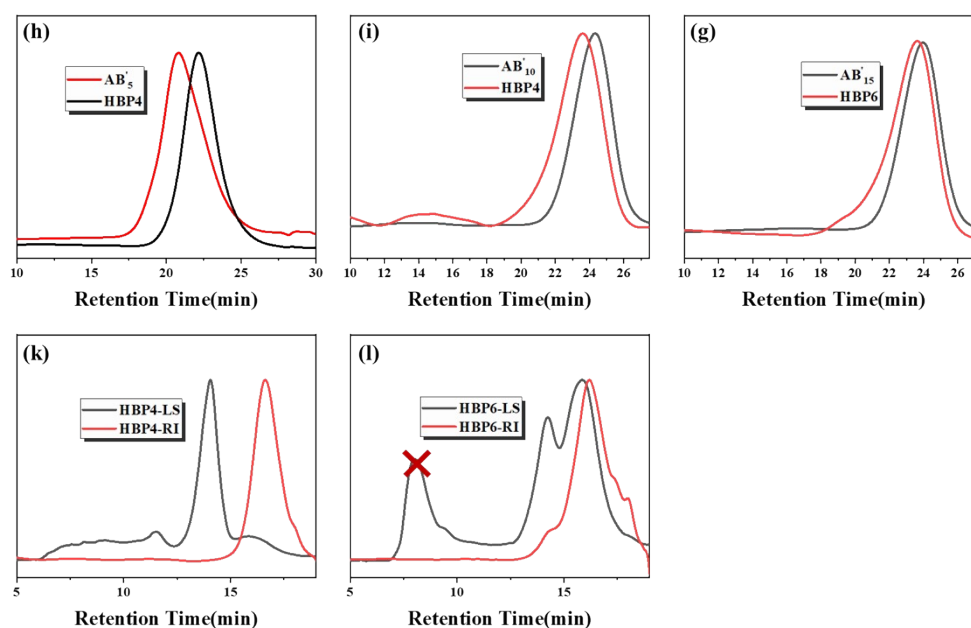

Fig. S8 GPC: (h-g ) Comparison of relative molecular weight changes based on linear polystyrene standards before and after HDA reaction of  $\text{AB}'_5$ ,  $\text{AB}'_{10}$  and  $\text{AB}'_{15}$  blocks; h)  $\text{AB}'_5$  (black  $M_n = 6000$ ,  $\mathcal{D} = 1.16$ ), and HBP4 (red  $M_n = 8200$   $\mathcal{D} = 1.25$ ); i)  $\text{AB}'_{10}$  (black  $M_n = 7000$ ,  $\mathcal{D} = 1.14$ ), and HBP5 (red  $M_n = 8683$   $\mathcal{D} = 1.29$ ); g)  $\text{AB}'_{15}$  (black  $M_n = 8800$ ,  $\mathcal{D} = 1.21$ ), and HBP6 (red  $M_n = 10700$   $\mathcal{D} = 1.31$ ). GPC-MALLS: (k-l) HBP4 and HBP6 absolute molecular weight characterization results; k) HBP4 by LS detector (black  $M_n = 413400$   $\mathcal{D} = 9.75$ ), and by RI detector (red  $M_n = 8200$   $\mathcal{D} = 1.25$ ); l) HBP6 by LS detector (black  $M_n = 73400$   $\mathcal{D} = 7.41$ ), and by RI detector (red  $M_n = 10700$   $\mathcal{D} = 1.31$ ).

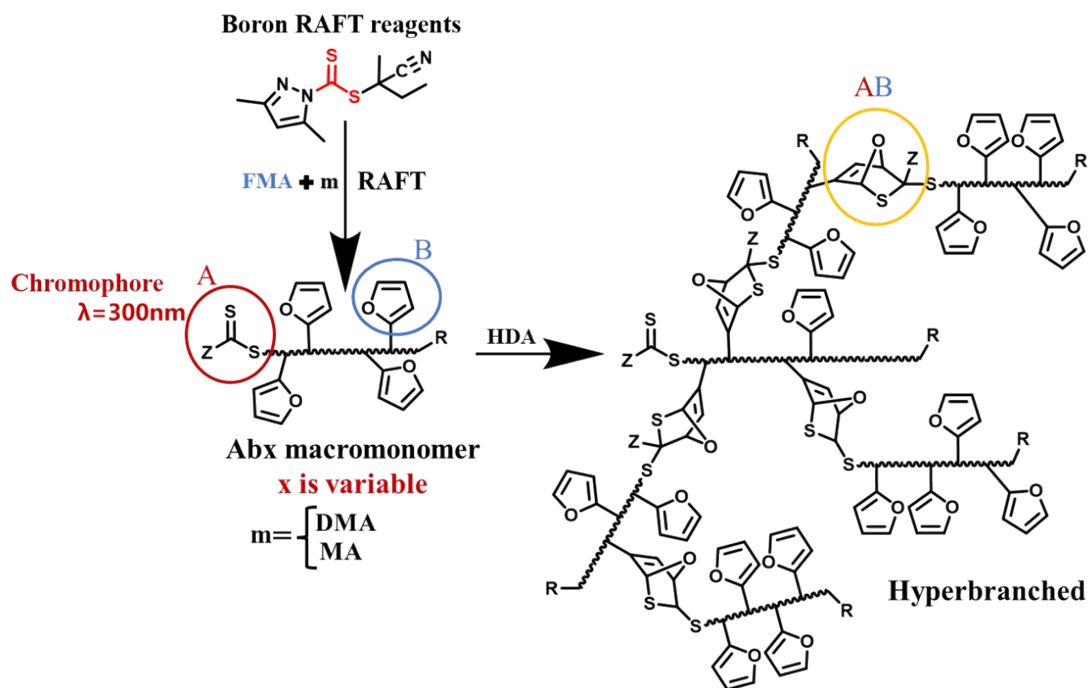

**Fig. S9** The schematic diagram of the UV testing principle for  $AB_x$  and hyperbranched polymers.

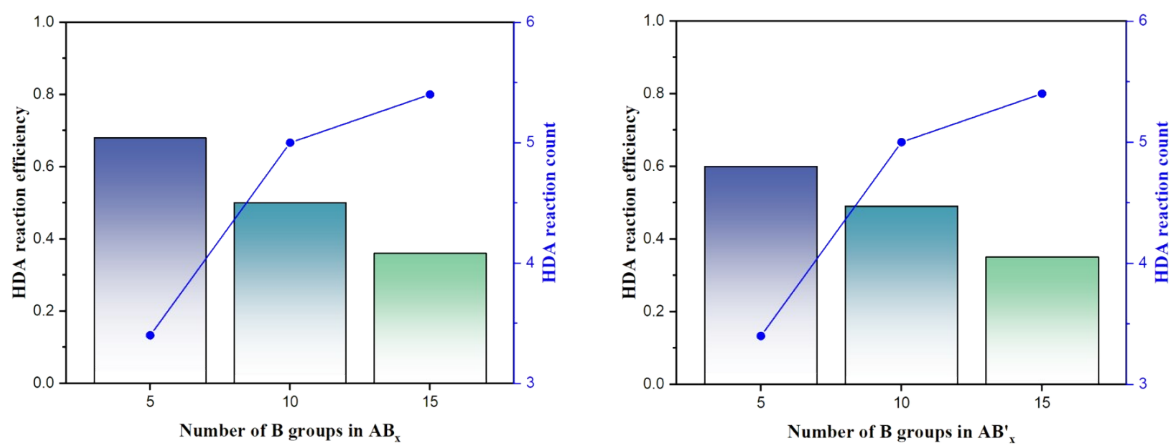

**Fig. S10** HDA reaction efficiency (bar chart) and the absolute number of functional groups undergoing the HDA reaction (line chart) for  $AB_x$  macromonomers with different functionalities. (a)  $AB_x$  obtained from the copolymerization of DMA and FMA; (b)  $AB'_x$  obtained from the copolymerization of MA and FMA.

**Table S1.** Summarized data on brush-like polymers after HDA reaction.

| Blocks  | r(furan/<br>dithioesters) | [F] <sub>0</sub><br>(mol.ML <sup>-1</sup> ) | [S] <sub>0</sub><br>(mol.ML <sup>-1</sup> ) | T(°C) | $M_n^b$ | $\mathcal{D}^b$ |
|---------|---------------------------|---------------------------------------------|---------------------------------------------|-------|---------|-----------------|
| M-MF1   |                           |                                             |                                             |       | -       | -               |
| M-MF2   |                           |                                             |                                             |       | 156700  | 1.14            |
| D-DF1   |                           |                                             |                                             |       | 14300   | 1.15            |
| D-DF2   |                           |                                             |                                             |       | 163300  | 1.09            |
| MM-MMF1 | 1                         | 10 <sup>-5</sup>                            | 10 <sup>-5</sup>                            | 60    | 799000  | 1.03            |
| MM-MMF2 |                           |                                             |                                             |       | 747700  | 1.04            |
| S-SF1   |                           |                                             |                                             |       | 25000   | 1.01            |
| S-SF2   |                           |                                             |                                             |       | 24400   | 1.02            |

r = reactivity ratio,  $M_n$  = number-average molecular weight,  $\mathcal{D}$  = dispersity index, 'b' obtained from GPC.

**Table S2.** Temperature probes for the synthesis of Ab<sub>x</sub> macromonomers.

| Blocks                                     | CTA  | T(°C) | Time (h) | $M_n^a$ | $M_n^b$ | $\mathcal{D}^b$ |
|--------------------------------------------|------|-------|----------|---------|---------|-----------------|
| P(DMA <sub>30</sub> -co-FMA <sub>5</sub> ) |      | 75    | 1        | 21500   | 22100   | 1.42            |
| P(DMA <sub>30</sub> -co-FMA <sub>5</sub> ) |      | 100   | 1        | 1000    | 3000    | 1.16            |
| P(DMA <sub>30</sub> -co-FMA <sub>5</sub> ) | CDPC | 100   | 2        | 1800    | 4700    | 1.15            |
| P(DMA <sub>30</sub> -co-FMA <sub>5</sub> ) |      | 100   | 4        | 2200    | 5000    | 1.18            |
| P(DMA <sub>30</sub> -co-FMA <sub>5</sub> ) |      | 100   | 6        | 3200    | 4600    | 1.04            |

$M_n$  = number-average molecular weight,  $\mathcal{D}$  = dispersity index, 'a' obtained from NMR, and 'b' obtained from GPC.

**Table S3.** Summarized data on AB<sub>x</sub> and AB'<sub>x</sub> building blocks.

| Blocks                                                          | $f$ | $M/f$<br>(g.mol <sup>-1</sup> ) | $DP^a$ | $M_n^a$ | $M_n^b$ | $\mathcal{D}^b$ |
|-----------------------------------------------------------------|-----|---------------------------------|--------|---------|---------|-----------------|
| P(DMA <sub>50</sub> -co-FMA <sub>5</sub> ) (AB <sub>5</sub> )   | 5   | 1336                            | 51     | 5400    | 5700    | 1.40            |
| P(DMA <sub>50</sub> -co-FMA <sub>10</sub> ) (AB <sub>10</sub> ) | 10  | 761                             | 62     | 6900    | 7200    | 1.30            |
| P(DMA <sub>50</sub> -co-FMA <sub>15</sub> ) (AB <sub>15</sub> ) | 15  | 474                             | 58     | 6600    | 6800    | 1.50            |
| P(MA <sub>50</sub> -co-FMA <sub>5</sub> ) (AB' <sub>5</sub> )   | 5   | 1449                            | 53     | 5800    | 6000    | 1.16            |
| P(MA <sub>50</sub> -co-FMA <sub>10</sub> ) (AB' <sub>10</sub> ) | 10  | 762                             | 60     | 6900    | 7000    | 1.14            |
| P(MA <sub>55</sub> -co-FMA <sub>15</sub> ) (AB' <sub>15</sub> ) | 15  | 586                             | 69     | 8200    | 8800    | 1.21            |

$f$  = Specifically refers to the number of functional groups required for the HDA reaction,  $M$  = relative molecular mass,  $DP$  = degree of polymerization,  $M_n$  = number-average molecular weight,  $\mathcal{D}$  = dispersity index, 'a' obtained from NMR, and 'b' obtained from GPC.
